# Supplementary material for: Unraveling the Etiology of Dilated Cardiomyopathy through Differential miRNA–mRNA Interactome
Source: MDPI journal article supplement (doi:10.3390/biom14050524), 2024-04-27
Supplement: s1 [file s1]

**Supplementary Table S1:** differentially expressed genes

| baseMean | log2FoldChange | lfcSE    | stat     | P value  | P adj    | Gene symbol     | ENTREZID  |
|----------|----------------|----------|----------|----------|----------|-----------------|-----------|
| 103.3716 | 5.35854        | 1.363896 | 3.928849 | 8.54E-05 | 0.020873 | SNAP25          | 6616      |
| 33.9948  | 3.837305       | 0.948362 | 4.046243 | 5.2E-05  | 0.015548 | SYT1            | 6857      |
| 86.96979 | 3.710857       | 0.752974 | 4.928266 | 8.3E-07  | 0.000985 | MTCO1P25        | 107075167 |
| 60.73746 | 3.274763       | 0.739737 | 4.426931 | 9.56E-06 | 0.00521  | KIF5A           | 3798      |
| 514.7249 | 2.774374       | 0.749374 | 3.702254 | 0.000214 | 0.036005 | HMGCS2          | 3158      |
| 16.71563 | 2.700608       | 0.699793 | 3.859154 | 0.000114 | 0.024239 | SULT4A1         | 25830     |
| 31.97241 | 2.56912        | 0.611245 | 4.203091 | 2.63E-05 | 0.010361 | CELF4           | 56853     |
| 77.29427 | 2.51401        | 0.537682 | 4.675641 | 2.93E-06 | 0.002263 | GYG2            | 8908      |
| 25.48023 | 2.511295       | 0.693126 | 3.623144 | 0.000291 | 0.043353 | DLGAP3          | 58512     |
| 15.0895  | 2.464574       | 0.594882 | 4.14296  | 3.43E-05 | 0.011767 | TTR             | 7276      |
| 14.84678 | 2.421989       | 0.646515 | 3.746225 | 0.00018  | 0.032434 | SNX31           | 169166    |
| 23.24875 | 2.290447       | 0.501649 | 4.565831 | 4.98E-06 | 0.00318  | ENSG00000219951 |           |
| 12.87241 | 2.227822       | 0.607712 | 3.66592  | 0.000246 | 0.039719 | MAST1           | 22983     |
| 22.87867 | 2.082218       | 0.525712 | 3.960755 | 7.47E-05 | 0.01915  | TBX1            | 6899      |
| 348.6463 | 2.032248       | 0.438467 | 4.634899 | 3.57E-06 | 0.002647 | ZP3             | 7784      |
| 178.8616 | 2.017945       | 0.506032 | 3.987785 | 6.67E-05 | 0.018449 | SLN             | 6588      |
| 104.2377 | 1.844862       | 0.504272 | 3.658469 | 0.000254 | 0.040539 | CHRD12          | 25884     |
| 27.40134 | 1.836501       | 0.500773 | 3.667336 | 0.000245 | 0.039719 | PLCH1           | 23007     |
| 122.9845 | 1.828365       | 0.326365 | 5.602208 | 2.12E-08 | 5.6E-05  | ABO             | 28        |
| 152.4626 | 1.790552       | 0.391844 | 4.569551 | 4.89E-06 | 0.00318  | CNTFR           | 1271      |
| 26.67171 | 1.786303       | 0.469495 | 3.804734 | 0.000142 | 0.028291 | ELMOD1          | 55531     |
| 271.9282 | 1.631335       | 0.447927 | 3.641966 | 0.000271 | 0.042497 | CBLN1           | 869       |
| 443.9272 | 1.625474       | 0.409103 | 3.973266 | 7.09E-05 | 0.018803 | POMZP3          | 22932     |
| 249.3629 | 1.38769        | 0.349292 | 3.972862 | 7.1E-05  | 0.018803 | SRRM3           | 222183    |
| 243.2669 | 1.35853        | 0.304791 | 4.457257 | 8.3E-06  | 0.004808 | HR              | 55806     |
| 478.8984 | 1.351987       | 0.217305 | 6.221595 | 4.92E-10 | 3.53E-06 | PTGDR2          | 11251     |
| 39.4704  | 1.345293       | 0.361061 | 3.725943 | 0.000195 | 0.034222 | LINC00968       | 100507632 |
| 62.21979 | 1.286092       | 0.35425  | 3.630463 | 0.000283 | 0.043335 | GALNT8          | 26290     |
| 729.9243 | 1.284844       | 0.187198 | 6.863549 | 6.72E-12 | 1.24E-07 | FNDC1           | 84624     |
| 181.954  | 1.280162       | 0.299754 | 4.270708 | 1.95E-05 | 0.008599 | MYBPC1          | 4604      |
| 135.213  | 1.269714       | 0.323492 | 3.92503  | 8.67E-05 | 0.020873 | WNT5B           | 81029     |
| 2440.949 | 1.251981       | 0.309693 | 4.042653 | 5.28E-05 | 0.015548 | CES1            | 1066      |
| 1127.406 | 1.247156       | 0.257389 | 4.845421 | 1.26E-06 | 0.001301 | CD300LG         | 146894    |
| 145.6204 | 1.224895       | 0.305863 | 4.00472  | 6.21E-05 | 0.017612 | PNCK            | 139728    |
| 290.4635 | 1.192825       | 0.307229 | 3.88253  | 0.000103 | 0.022784 | SDK1            | 221935    |
| 579.3032 | 1.173555       | 0.272409 | 4.308063 | 1.65E-05 | 0.008033 | PAX8-AS1        | 654433    |
| 282.752  | 1.127178       | 0.298179 | 3.780212 | 0.000157 | 0.029635 | PLP1            | 5354      |
| 68.43529 | 1.124438       | 0.263915 | 4.260608 | 2.04E-05 | 0.008787 | ALDOAP2         | 228       |
| 9526.826 | 1.100775       | 0.271034 | 4.061384 | 4.88E-05 | 0.014822 | PDLIM3          | 27295     |
| 159.0515 | 1.089789       | 0.261645 | 4.165139 | 3.11E-05 | 0.011301 | S100A14         | 57402     |
| 515.4124 | 1.087234       | 0.231416 | 4.698179 | 2.62E-06 | 0.002211 | KAZALD1         | 81621     |
| 559.3808 | 1.025175       | 0.283343 | 3.618138 | 0.000297 | 0.043648 | TSKU            | 25987     |

Supplementary Table S1 (continued)

| baseMean | log2FoldChange | lfcSE    | stat     | P value  | P adj    | Gene symbol     | ENTREZID  |
|----------|----------------|----------|----------|----------|----------|-----------------|-----------|
| 363.7425 | 1.023621       | 0.277085 | 3.694255 | 0.000221 | 0.036494 | LRRN4CL         | 221091    |
| 288.3557 | 0.942637       | 0.236898 | 3.979078 | 6.92E-05 | 0.018803 | SYT13           | 57586     |
| 109.8005 | 0.917669       | 0.213297 | 4.302304 | 1.69E-05 | 0.008033 | RAB11B-AS1      | 100507567 |
| 1447.357 | 0.903622       | 0.22559  | 4.005598 | 6.19E-05 | 0.017612 | CRISPLD2        | 83716     |
| 1093.742 | 0.882909       | 0.216842 | 4.071662 | 4.67E-05 | 0.014419 | NUDT8           | 254552    |
| 231.6893 | 0.851143       | 0.216832 | 3.925355 | 8.66E-05 | 0.020873 | FABP5P9         | 642956    |
| 435.5182 | 0.838323       | 0.233572 | 3.589148 | 0.000332 | 0.047666 | BHMT2           | 23743     |
| 1399.806 | 0.835675       | 0.21704  | 3.850328 | 0.000118 | 0.024844 | PDE2A           | 5138      |
| 1287.517 | 0.829954       | 0.227096 | 3.654647 | 0.000258 | 0.040796 | PLTP            | 5360      |
| 534.0874 | 0.82385        | 0.181072 | 4.549858 | 5.37E-06 | 0.003316 | TIMP4           | 7079      |
| 551.4224 | 0.817122       | 0.209826 | 3.894282 | 9.85E-05 | 0.022536 | FABP5P11        | 266699    |
| 1053.513 | 0.815254       | 0.195935 | 4.160841 | 3.17E-05 | 0.011301 | PLXDC1          | 57125     |
| 4384.867 | 0.813414       | 0.214492 | 3.792286 | 0.000149 | 0.029121 | FABP5           | 2171      |
| 797.6324 | 0.78325        | 0.127307 | 6.152459 | 7.63E-10 | 3.53E-06 | PAMR1           | 25891     |
| 3232.742 | 0.760725       | 0.203358 | 3.740816 | 0.000183 | 0.032688 | TSC22D3         | 1831      |
| 1602.826 | 0.741777       | 0.178089 | 4.165212 | 3.11E-05 | 0.011301 | DDIT4           | 54541     |
| 196.2882 | 0.739654       | 0.188755 | 3.918586 | 8.91E-05 | 0.020896 | RPL12P8         | 645161    |
| 435.4516 | 0.706236       | 0.17292  | 4.084168 | 4.42E-05 | 0.013896 | PID1            | 55022     |
| 188.9824 | 0.703189       | 0.193931 | 3.62597  | 0.000288 | 0.043353 | RPL12P12        | 85824     |
| 172.1906 | 0.678633       | 0.179464 | 3.78145  | 0.000156 | 0.029635 | NMNAT2          | 23057     |
| 1229.824 | 0.667986       | 0.183592 | 3.638437 | 0.000274 | 0.042721 | PCSK6           | 5046      |
| 9295.354 | 0.666469       | 0.183889 | 3.624304 | 0.00029  | 0.043353 | TNXB            | 7148      |
| 393.1214 | 0.664973       | 0.169633 | 3.920071 | 8.85E-05 | 0.020896 | HIGD1B          | 51751     |
| 8758.007 | 0.663834       | 0.107194 | 6.192819 | 5.91E-10 | 3.53E-06 | ENG             | 2022      |
| 25666.23 | 0.654682       | 0.159109 | 4.114681 | 3.88E-05 | 0.012832 | TIMP3           | 7078      |
| 4131.618 | 0.620828       | 0.145177 | 4.276363 | 1.9E-05  | 0.008588 | HTRA3           | 94031     |
| 1732.045 | 0.611131       | 0.112666 | 5.424274 | 5.82E-08 | 0.000135 | JAG2            | 3714      |
| 2493.125 | 0.564403       | 0.145112 | 3.88942  | 0.0001   | 0.022712 | ITIH5           | 80760     |
| 11281.08 | 0.560132       | 0.131909 | 4.246353 | 2.17E-05 | 0.008949 | SLC9A3R2        | 9351      |
| 795.0078 | 0.549035       | 0.131603 | 4.171918 | 3.02E-05 | 0.011301 | SIGIRR          | 59307     |
| 2378.357 | 0.540611       | 0.120821 | 4.474482 | 7.66E-06 | 0.004579 | SCPEP1          | 59342     |
| 3683.29  | 0.540212       | 0.107711 | 5.015378 | 5.29E-07 | 0.000755 | INSYN1          | 388135    |
| 1546.82  | 0.51172        | 0.135884 | 3.765867 | 0.000166 | 0.030457 | ITPKB           | 3707      |
| 1626.586 | -0.50063       | 0.115177 | -4.34662 | 1.38E-05 | 0.006925 | ZNF710-AS1      | 109729181 |
| 594.9081 | -0.50778       | 0.105718 | -4.80319 | 1.56E-06 | 0.001523 | REST            | 5978      |
| 1053.006 | -0.51327       | 0.135881 | -3.77739 | 0.000158 | 0.029669 | GATAD2B         | 57459     |
| 492.0889 | -0.52163       | 0.107625 | -4.84671 | 1.26E-06 | 0.001301 | ENSG00000284968 |           |
| 937.4188 | -0.54001       | 0.12711  | -4.24839 | 2.15E-05 | 0.008949 | SGMS2           | 166929    |
| 5144.709 | -0.54007       | 0.109694 | -4.92347 | 8.5E-07  | 0.000985 | PDP1            | 54704     |
| 3741.083 | -0.5465        | 0.119406 | -4.57682 | 4.72E-06 | 0.00318  | DDX6            | 1656      |
| 967.0277 | -0.58452       | 0.15342  | -3.80992 | 0.000139 | 0.028005 | SRRM1           | 10250     |
| 792.7498 | -0.60764       | 0.107997 | -5.62647 | 1.84E-08 | 5.6E-05  | AP3M2           | 10947     |

**Supplementary Table S1 (continued)**

| <b>baseMean</b> | <b>log2FoldChange</b> | <b>lfcSE</b> | <b>stat</b> | <b>P value</b> | <b>P adj</b> | <b>Gene symbol</b> | <b>ENTREZID</b> |
|-----------------|-----------------------|--------------|-------------|----------------|--------------|--------------------|-----------------|
| 224.9062        | -0.6465               | 0.173855     | -3.71863    | 0.0002         | 0.034375     | HERC5              | 51191           |
| 750.8128        | -0.64772              | 0.123615     | -5.23984    | 1.61E-07       | 0.000271     | CPNE1              | 8904            |
| 229.1427        | -0.66726              | 0.181759     | -3.6711     | 0.000242       | 0.039612     | OAS1               | 4938            |
| 981.0647        | -0.67392              | 0.136575     | -4.93443    | 8.04E-07       | 0.000985     | ZNF91              | 7644            |
| 494.5421        | -0.69485              | 0.173609     | -4.00235    | 6.27E-05       | 0.017612     | LIG4               | 3981            |
| 1877.34         | -0.7264               | 0.187327     | -3.87773    | 0.000105       | 0.022784     | GOLGA3             | 2802            |
| 240.3047        | -0.73026              | 0.196072     | -3.72447    | 0.000196       | 0.034222     | ARSG               | 22901           |
| 799.4427        | -0.73057              | 0.140303     | -5.20708    | 1.92E-07       | 0.000296     | EFNA5              | 1946            |
| 911.7908        | -0.73248              | 0.168461     | -4.34807    | 1.37E-05       | 0.006925     | ATM                | 472             |
| 922.8021        | -0.75298              | 0.183522     | -4.10292    | 4.08E-05       | 0.013265     | SORL1              | 6653            |
| 393.4003        | -0.79648              | 0.168447     | -4.72838    | 2.26E-06       | 0.002097     | PTPRJ              | 5795            |
| 12694.58        | -0.85002              | 0.228376     | -3.72204    | 0.000198       | 0.034231     | PPM1K              | 152926          |
| 1484.824        | -0.85618              | 0.237822     | -3.60009    | 0.000318       | 0.046062     | GABRA4             | 2557            |
| 119.5643        | -0.92777              | 0.245333     | -3.7817     | 0.000156       | 0.029635     | TTC39C             | 125488          |
| 206.7986        | -1.03228              | 0.266253     | -3.87707    | 0.000106       | 0.022784     | XRRA1              | 143570          |
| 602.8123        | -1.0365               | 0.26943      | -3.84702    | 0.00012        | 0.024898     | DUSP5              | 1847            |
| 606.1124        | -1.04682              | 0.222698     | -4.70064    | 2.59E-06       | 0.002211     | PLEKHA7            | 144100          |
| 64.92311        | -1.04794              | 0.264951     | -3.95523    | 7.65E-05       | 0.01915      | SEMA4A             | 64218           |
| 2724.318        | -1.06424              | 0.230888     | -4.60934    | 4.04E-06       | 0.00288      | INPP4B             | 8821            |
| 1113.706        | -1.11171              | 0.250507     | -4.43785    | 9.09E-06       | 0.005103     | BCL2               | 596             |
| 215.349         | -1.1523               | 0.204066     | -5.64668    | 1.64E-08       | 5.6E-05      | MB21D2             | 151963          |
| 462.0421        | -1.26546              | 0.240751     | -5.25628    | 1.47E-07       | 0.000271     | ENSG00000259370    |                 |
| 1132.49         | -1.29556              | 0.276684     | -4.68248    | 2.83E-06       | 0.002263     | KCNK6              | 9424            |
| 1678.806        | -1.29649              | 0.246938     | -5.25025    | 1.52E-07       | 0.000271     | ANKRD33B           | 651746          |
| 28.21735        | -2.00201              | 0.505823     | -3.95792    | 7.56E-05       | 0.01915      | CD300E             | 342510          |
| 16.95251        | -2.31499              | 0.609205     | -3.80002    | 0.000145       | 0.028527     | CCR7               | 1236            |
| 37.25818        | -2.54466              | 0.687161     | -3.70315    | 0.000213       | 0.036005     | ITGA2B             | 3674            |

**Supplementary Table S2:** miRNA raw counts table.

| miRNA name      | VCM_14   | VCM_17  | VCM_18  | VCM_19   | ICM_13  | ICM_5    | ICM_7   |
|-----------------|----------|---------|---------|----------|---------|----------|---------|
| hsa-miR-1-3p    | 12013900 | 8228310 | 9438228 | 10430851 | 7847928 | 11110057 | 1762018 |
| hsa-miR-143-3p  | 4075989  | 3367174 | 2876046 | 1954576  | 2979429 | 2070468  | 327460  |
| hsa-let-7a-5p   | 1592377  | 1515541 | 1782506 | 1104384  | 1235677 | 1381467  | 1613307 |
| hsa-let-7f-5p   | 1005847  | 853919  | 1057845 | 692808   | 791837  | 907027   | 577257  |
| hsa-miR-26a-5p  | 1019994  | 853848  | 900248  | 641055   | 633871  | 585077   | 268412  |
| hsa-miR-30d-5p  | 915208   | 638704  | 857424  | 621000   | 557039  | 614614   | 202637  |
| hsa-miR-30a-5p  | 545129   | 468504  | 610764  | 416463   | 387885  | 438726   | 87089   |
| hsa-miR-30c-5p  | 361008   | 362154  | 406911  | 247483   | 396647  | 323547   | 85790   |
| hsa-miR-27b-3p  | 344572   | 321332  | 351249  | 214646   | 211652  | 258712   | 53436   |
| hsa-miR-24-3p   | 320939   | 337700  | 291915  | 153200   | 281164  | 214794   | 44226   |
| hsa-miR-133a-3p | 296044   | 233150  | 220799  | 183811   | 213379  | 234575   | 89135   |
| hsa-miR-21-5p   | 169348   | 236156  | 242298  | 85555    | 255594  | 274786   | 32737   |
| hsa-miR-125b-5p | 234775   | 240786  | 258980  | 120612   | 146410  | 160661   | 82489   |
| hsa-let-7g-5p   | 217005   | 201563  | 201803  | 160130   | 174584  | 168228   | 117385  |
| hsa-miR-486-5p  | 186621   | 100657  | 98159   | 113031   | 117876  | 97749    | 334708  |
| hsa-miR-486-3p  | 186621   | 100657  | 98159   | 113031   | 117876  | 97749    | 334708  |
| hsa-miR-126-3p  | 202350   | 165777  | 185213  | 153517   | 158310  | 130761   | 27602   |
| hsa-miR-23b-3p  | 178013   | 171600  | 170297  | 88880    | 110999  | 119130   | 40012   |
| hsa-miR-30e-5p  | 178998   | 129557  | 154413  | 132078   | 111301  | 132770   | 23485   |

**Supplementary Table S3:** differentially expressed miRNAs.

| baseMean | log2FoldChange | lfcSE    | stat     | P value  | P adj    | miRNA           |
|----------|----------------|----------|----------|----------|----------|-----------------|
| 253.4688 | 1.143511       | 0.272814 | 4.19154  | 2.77E-05 | 0.011609 | hsa-miR-494-3p  |
| 5120.321 | 0.990214       | 0.287046 | 3.449667 | 0.000561 | 0.048661 | hsa-miR-218-5p  |
| 972.3113 | 0.823972       | 0.231523 | 3.558927 | 0.000372 | 0.048661 | hsa-miR-487b-3p |
| 1331.771 | -1.77934       | 0.509483 | -3.49244 | 0.000479 | 0.048661 | hsa-miR-106b-3p |
| 98.12613 | -2.32649       | 0.676209 | -3.44048 | 0.000581 | 0.048661 | hsa-miR-193b-5p |

**Supplementary Table S4:** top 30 enriched GO terms categorized by the CC.

| ID         | Description                              | setSize | enrichmentScore | NES        | pvalue     | p.adjust   |
|------------|------------------------------------------|---------|-----------------|------------|------------|------------|
| GO:0062023 | collagen-containing extracellular matrix | 328     | 0,5453024       | 2,28518852 | 1E-10      | 1,7975E-08 |
| GO:0031012 | extracellular matrix                     | 417     | 0,52806228      | 2,2665523  | 1E-10      | 1,7975E-08 |
| GO:0030312 | external encapsulating structure         | 418     | 0,52421527      | 2,24807263 | 1E-10      | 1,7975E-08 |
| GO:0005796 | Golgi lumen                              | 60      | 0,66296548      | 2,2067721  | 3,8387E-07 | 1,38E-05   |
| GO:0043679 | axon terminus                            | 73      | 0,64020874      | 2,18949407 | 3,2282E-07 | 1,2216E-05 |
| GO:0098803 | respiratory chain complex                | 71      | 0,63691274      | 2,15219082 | 1,057E-07  | 4,7497E-06 |
| GO:0005746 | mitochondrial respirasome                | 75      | 0,61520315      | 2,11584985 | 3,2228E-07 | 1,2216E-05 |
| GO:0070469 | respirasome                              | 81      | 0,6031969       | 2,10173118 | 4,8956E-07 | 1,5304E-05 |
| GO:1902495 | transmembrane transporter complex        | 247     | 0,50122372      | 2,05003144 | 1,9095E-09 | 1,9613E-07 |
| GO:1990351 | transporter complex                      | 267     | 0,49201299      | 2,02094026 | 7,0388E-10 | 8,4348E-08 |
| GO:0005581 | collagen trimer                          | 68      | 0,56747154      | 1,91180425 | 0,00010117 | 0,001347   |
| GO:0070069 | cytochrome complex                       | 32      | 0,6463447       | 1,88725612 | 0,00088592 | 0,00804619 |
| GO:0008328 | ionotropic glutamate receptor complex    | 24      | 0,68109712      | 1,88021852 | 0,00158098 | 0,01291732 |
| GO:0098978 | glutamatergic synapse                    | 259     | 0,4467091       | 1,82941414 | 4,5566E-07 | 1,4892E-05 |
| GO:0098798 | mitochondrial protein-containing complex | 254     | 0,4414411       | 1,80746777 | 1,3879E-06 | 3,1487E-05 |
| GO:0005761 | mitochondrial ribosome                   | 78      | 0,48178101      | 1,6745208  | 0,00205247 | 0,01604052 |
| GO:1904115 | axon cytoplasm                           | 58      | 0,50667837      | 1,67127979 | 0,00384093 | 0,02681196 |
| GO:0031253 | cell projection membrane                 | 267     | 0,36965444      | 1,5183533  | 0,00089527 | 0,00804619 |
| GO:0001650 | fibrillar center                         | 130     | -0,3638774      | -1,4795298 | 0,00745849 | 0,04302924 |
| GO:0032580 | Golgi cisterna membrane                  | 78      | -0,4223476      | -1,5991899 | 0,00631283 | 0,03814224 |
| GO:0099023 | vesicle tethering complex                | 59      | -0,4497836      | -1,6243273 | 0,00714635 | 0,04177421 |
| GO:0009897 | external side of plasma membrane         | 276     | -0,3874302      | -1,7297517 | 2,2903E-06 | 4,3335E-05 |
| GO:0044853 | plasma membrane raft                     | 95      | -0,4472822      | -1,7662898 | 0,00077921 | 0,00747001 |
| GO:0005801 | cis-Golgi network                        | 60      | -0,4986404      | -1,8015534 | 0,00126033 | 0,01078785 |
| GO:0044194 | cytolytic granule                        | 13      | -0,7253837      | -1,8267259 | 0,00502798 | 0,0331662  |
| GO:0000137 | Golgi cis cisterna                       | 19      | -0,6896805      | -1,9356659 | 0,0013227  | 0,01118852 |
| GO:0005942 | phosphatidylinositol 3-kinase complex    | 25      | -0,6651944      | -1,9948116 | 0,0006424  | 0,00633663 |
| GO:0042101 | T cell receptor complex                  | 14      | -0,8164057      | -2,1131003 | 6,1597E-05 | 0,00086839 |
| GO:0071682 | endocytic vesicle lumen                  | 17      | -0,7822143      | -2,1530626 | 2,9847E-05 | 0,0004566  |
| GO:0001772 | immunological synapse                    | 42      | -0,7007075      | -2,3511775 | 1,4223E-07 | 6,0155E-06 |

**Supplementary Table S5:** top 40 enriched GO terms categorized by the BP.

| ID         | Description                                                                     | setSize | enrichmentScore | NES        | pvalue      | p.adjust    |
|------------|---------------------------------------------------------------------------------|---------|-----------------|------------|-------------|-------------|
| GO:0140448 | signaling receptor ligand precursor processing                                  | 30      | 0,69429527      | 2,0251174  | 0,00012601  | 0,00351235  |
| GO:0007268 | chemical synaptic transmission                                                  | 484     | 0,45267679      | 1,98001763 | 1E-10       | 4,2432E-08  |
| GO:0098916 | anterograde trans-synaptic signaling                                            | 484     | 0,45267679      | 1,98001763 | 1E-10       | 4,2432E-08  |
| GO:0099537 | trans-synaptic signaling                                                        | 492     | 0,45088261      | 1,97156587 | 1E-10       | 4,2432E-08  |
| GO:0030198 | extracellular matrix organization                                               | 245     | 0,47284428      | 1,95417501 | 1,0719E-07  | 1,6635E-05  |
| GO:0043062 | extracellular structure organization                                            | 245     | 0,47284428      | 1,95417501 | 1,0719E-07  | 1,6635E-05  |
| GO:0099177 | regulation of trans-synaptic signaling                                          | 327     | 0,45846076      | 1,9439441  | 2,984E-09   | 7,7882E-07  |
| GO:0032964 | collagen biosynthetic process                                                   | 32      | 0,64343019      | 1,90526756 | 0,0003333   | 0,00714053  |
| GO:0003071 | renal system process involved in regulation of systemic arterial blood pressure | 19      | 0,70771021      | 1,89265222 | 0,00222826  | 0,02924954  |
| GO:0003044 | regulation of systemic arterial blood pressure mediated by a chemical signal    | 37      | 0,61724599      | 1,88163987 | 0,00035947  | 0,00753317  |
| GO:0010257 | NADH dehydrogenase complex assembly                                             | 53      | 0,57590728      | 1,88024167 | 0,00019098  | 0,00464674  |
| GO:0032981 | mitochondrial respiratory chain complex I assembly                              | 53      | 0,57590728      | 1,88024167 | 0,00019098  | 0,00464674  |
| GO:0017158 | regulation of calcium ion-dependent exocytosis                                  | 29      | 0,6252529       | 1,81735001 | 0,00168537  | 0,02371916  |
| GO:0010712 | regulation of collagen metabolic process                                        | 29      | 0,61892282      | 1,79895111 | 0,0021348   | 0,02844082  |
| GO:0035637 | multicellular organismal signaling                                              | 126     | 0,46804524      | 1,78411539 | 9,5534E-05  | 0,00290243  |
| GO:0007156 | homophilic cell adhesion via plasma membrane adhesion molecules                 | 125     | 0,45845174      | 1,7452975  | 0,00058239  | 0,01075271  |
| GO:0015909 | long-chain fatty acid transport                                                 | 43      | 0,55220412      | 1,73580131 | 0,00374126  | 0,04229127  |
| GO:0006813 | potassium ion transport                                                         | 152     | 0,42967961      | 1,6670012  | 0,0006011   | 0,01093827  |
| GO:0030178 | negative regulation of Wnt signaling pathway                                    | 145     | 0,42484151      | 1,64194267 | 0,00061891  | 0,01117544  |
| GO:0071805 | potassium ion transmembrane transport                                           | 135     | 0,42747759      | 1,63744522 | 0,00119857  | 0,01865094  |
| GO:0044770 | cell cycle phase transition                                                     | 443     | -0,3553325      | -1,6470128 | 7,63334E-08 | 1,28914E-05 |
| GO:1901857 | positive regulation of cellular respiration                                     | 11      | -0,7529459      | -1,8289622 | 0,003681202 | 0,041856358 |
| GO:0002263 | cell activation involved in immune response                                     | 219     | -0,4199459      | -1,8412835 | 4,25423E-07 | 4,77574E-05 |
| GO:0006968 | cellular defense response                                                       | 35      | -0,5761738      | -1,8812999 | 0,00137521  | 0,020890097 |
| GO:0007259 | receptor signaling pathway via JAK-STAT                                         | 106     | -0,47771        | -1,8855337 | 2,0901E-05  | 0,000902358 |
| GO:0002228 | natural killer cell mediated immunity                                           | 51      | -0,5517357      | -1,9222175 | 0,000100021 | 0,002991268 |
| GO:0019221 | cytokine-mediated signaling pathway                                             | 344     | -0,4294078      | -1,9634103 | 1,10847E-10 | 4,24322E-08 |

**Supplementary Table S5 (continued)**

| <b>ID</b>  | <b>Description</b>                                     | <b>setSize</b> | <b>enrichmentScore</b> | <b>NES</b> | <b>pvalue</b> | <b>p.adjust</b> |
|------------|--------------------------------------------------------|----------------|------------------------|------------|---------------|-----------------|
| GO:0050868 | negative regulation of T cell activation               | 96             | -0,5079571             | -1,9844703 | 1,77213E-05   | 0,000770876     |
| GO:0002269 | leukocyte activation involved in inflammatory response | 37             | -0,600168              | -1,9900152 | 0,000263388   | 0,006001474     |
| GO:0080164 | regulation of nitric oxide metabolic process           | 50             | -0,5837799             | -2,0300391 | 5,24989E-05   | 0,001872353     |
| GO:2001057 | reactive nitrogen species metabolic process            | 67             | -0,5465749             | -2,0311903 | 1,09966E-05   | 0,000517559     |
| GO:0046209 | nitric oxide metabolic process                         | 66             | -0,551051              | -2,0402017 | 2,81383E-05   | 0,001152075     |
| GO:1990266 | neutrophil migration                                   | 81             | -0,5417037             | -2,0678527 | 3,11655E-06   | 0,000198836     |
| GO:0045428 | regulation of nitric oxide biosynthetic process        | 48             | -0,6043816             | -2,0889318 | 4,02774E-05   | 0,001492083     |
| GO:1990868 | response to chemokine                                  | 59             | -0,5940426             | -2,1309035 | 3,07291E-06   | 0,000198254     |
| GO:1990868 | response to chemokine                                  | 59             | -0,5940426             | -2,1309035 | 3,07291E-06   | 0,000198254     |
| GO:0030098 | lymphocyte differentiation                             | 296            | -0,4774399             | -2,1622774 | 1E-10         | 4,24322E-08     |
| GO:0002367 | cytokine production involved in immune response        | 82             | -0,5633417             | -2,1623849 | 6,72138E-07   | 5,93757E-05     |
| GO:0030217 | T cell differentiation                                 | 212            | -0,5121204             | -2,2386641 | 1E-10         | 4,24322E-08     |
| GO:0032611 | interleukin-1 beta production                          | 71             | -0,6243411             | -2,3319627 | 2,28258E-08   | 4,51951E-06     |

**Supplementary Table S6:** top 26 enriched GO terms categorized by the MF

| ID         | Description                                                                           | setSize | enrichmentScore | NES        | pvalue     | p.adjust   |
|------------|---------------------------------------------------------------------------------------|---------|-----------------|------------|------------|------------|
| GO:0005201 | extracellular matrix structural constituent                                           | 132     | 0,60006653      | 2,27480172 | 5,1222E-10 | 1,0808E-07 |
| GO:0015453 | oxidoreduction-driven active transmembrane transporter activity                       | 58      | 0,61004176      | 2,01121009 | 1,4327E-05 | 0,00071977 |
| GO:0048306 | calcium-dependent protein binding                                                     | 63      | 0,58515261      | 1,97433487 | 2,2617E-05 | 0,00108459 |
| GO:0008324 | cation transmembrane transporter activity                                             | 418     | 0,45202681      | 1,95308215 | 1E-10      | 1,055E-07  |
| GO:0016655 | oxidoreductase activity, acting on NAD(P)H, quinone or similar compound as acceptor   | 47      | 0,60582346      | 1,93994063 | 0,00013    | 0,00457166 |
| GO:0005539 | glycosaminoglycan binding                                                             | 166     | 0,49620288      | 1,92154624 | 5,1626E-07 | 3,8904E-05 |
| GO:0005518 | collagen binding                                                                      | 61      | 0,57049976      | 1,90851202 | 0,00012145 | 0,00441822 |
| GO:0008137 | NADH dehydrogenase (ubiquinone) activity                                              | 33      | 0,6298049       | 1,87489398 | 0,00044182 | 0,01081153 |
| GO:0033293 | monocarboxylic acid binding                                                           | 53      | 0,5740638       | 1,87069613 | 0,00032394 | 0,00876305 |
| GO:0003954 | NADH dehydrogenase activity                                                           | 36      | 0,61018152      | 1,84202274 | 0,00091843 | 0,01605471 |
| GO:0015318 | inorganic molecular entity transmembrane transporter activity                         | 465     | 0,40861049      | 1,77275041 | 3,2962E-08 | 3,1613E-06 |
| GO:0016616 | oxidoreductase activity, acting on the CH-OH group of donors, NAD or NADP as acceptor | 97      | 0,48606021      | 1,76771112 | 0,00046116 | 0,01081153 |
| GO:0009055 | electron transfer activity                                                            | 104     | 0,47559756      | 1,73832136 | 0,00044388 | 0,01081153 |
| GO:0004364 | glutathione transferase activity                                                      | 19      | 0,66463652      | 1,72904474 | 0,00443476 | 0,04742471 |
| GO:0004714 | transmembrane receptor protein tyrosine kinase activity                               | 51      | 0,51412493      | 1,66915862 | 0,00411155 | 0,0456598  |
| GO:0030545 | signaling receptor regulator activity                                                 | 258     | 0,35136486      | 1,44370091 | 0,00207789 | 0,02846984 |
| GO:0003779 | actin binding                                                                         | 384     | -0,2891084      | -1,360626  | 0,00228368 | 0,02902747 |
| GO:0005126 | cytokine receptor binding                                                             | 154     | -0,3630985      | -1,5003371 | 0,00225972 | 0,02902747 |
| GO:0008013 | beta-catenin binding                                                                  | 77      | -0,4324924      | -1,6036433 | 0,00454456 | 0,04794509 |
| GO:0005125 | cytokine activity                                                                     | 98      | -0,4128865      | -1,606756  | 0,00237188 | 0,02978973 |
| GO:0008094 | ATP-dependent activity, acting on DNA                                                 | 92      | -0,4469948      | -1,7084209 | 0,00069551 | 0,01358814 |
| GO:0019825 | oxygen binding                                                                        | 16      | -0,6772916      | -1,7756399 | 0,00213555 | 0,0288847  |
| GO:0016493 | C-C chemokine receptor activity                                                       | 15      | -0,7462194      | -1,9403621 | 0,00040353 | 0,01038345 |
| GO:0019956 | chemokine binding                                                                     | 26      | -0,6576714      | -1,962243  | 0,00027722 | 0,00790444 |
| GO:0046935 | 1-phosphatidylinositol-3-kinase regulator activity                                    | 13      | -0,8196509      | -2,0198798 | 2,9172E-05 | 0,0013292  |
| GO:0140375 | immune receptor activity                                                              | 103     | -0,5308933      | -2,0948165 | 8,1377E-07 | 5,0502E-05 |
